## Metabolic Physiological Networks: The Impact of Age

1 **Antonio Barajas-Martínez<sup>1,2,4</sup>, Jonathan F. Easton<sup>2,3</sup>, Ana Leonor Rivera<sup>2,3</sup>, Ricardo Martínez-**  
2 **Tapia<sup>1,4</sup>, Lizbeth de la Cruz<sup>1</sup>, Adriana Robles Cabrera<sup>3,4</sup>, Christopher R. Stephens<sup>2,3</sup>.**

3 <sup>1</sup>Department of Physiology, School of Medicine, UNAM, Mexico City, Mexico

4 <sup>2</sup>Center of Complexity Sciences, UNAM, Mexico City, Mexico

5 <sup>3</sup>Institute of Nuclear Sciences, UNAM, Mexico City, Mexico.

6 <sup>4</sup>Programa de Doctorado en Ciencias Biomédicas, UNAM, Mexico City, Mexico.

7  
8 **\* Correspondence:**

9 Christopher R. Stephens

10 stephens@nucleares.unam.mx

11

12 **Keywords: Metabolic syndrome<sub>1</sub>, Physiological Networks<sub>2</sub>, Systems biology<sub>3</sub>, Biomarkers<sub>4</sub>,**  
13 **Ageing<sub>5</sub>.**

14

### 15 **Abstract**

16 Metabolic homeostasis emerges from the interplay between several feedback systems that regulate  
17 the physiological variables related to energy expenditure and energy availability, maintaining them  
18 within a certain range. Although it is well known how each individual physiological system  
19 functions, there is little research focused on how the integration and adjustment of multiple systems  
20 results in the generation of metabolic health. The aim here was to generate an integrative model of  
21 metabolism, seen as a physiological network, and study how it changes across the human lifespan.  
22 We used data from a transverse, community-based study of an ethnically and educationally diverse  
23 sample of 2572 adults. Each participant answered an extensive questionnaire and underwent  
24 anthropometric measurements (height, weight, waist), fasting blood tests (glucose, HbA1c, basal  
25 insulin, cholesterol HDL, LDL, triglycerides, uric acid, urea, creatinine), along with vital signs  
26 (axillary temperature, systolic and diastolic blood pressure). The sample was divided into 6 groups of  
27 increasing age, beginning with less than 25 years and increasing by decades up to more than 65  
28 years. In order to model metabolic homeostasis as a network, we used these 15 physiological  
29 variables as nodes and modeled the links between them, either as a continuous association of those  
30 variables, or as a dichotomic association of their corresponding pathological states. Weight and  
31 overweight emerged as the most influential nodes in both types of networks, while high betweenness  
32 parameters, such as triglycerides, uric acid and insulin, were shown to act as gatekeepers between the  
33 affected physiological systems. As age increases, the loss of metabolic homeostasis is revealed by  
34 changes in the network's topology that reflect changes in the system-wide interactions that, in turn,  
35 expose underlying health stages. Hence, specific structural properties of the network, such as  
36 weighted transitivity, can provide topology-based indicators of health that assess the whole state of  
37 the system.

## 38 1. Introduction

39 Metabolic homeostasis arises from the interchanges between multiple chains of biochemical reactions  
40 and their mechanical responses. These exchanges maintain variables related to energy expenditure  
41 and energy availability within suitable ranges for the organism. The components of these chains are  
42 shared by multiple others, thereby constituting a metabolic network. Unfortunately, many processes  
43 of this network are not readily accessible in the clinical setting. Therefore, to make inferences about  
44 the underlying energy metabolism, various biomarkers –either biochemical or anthropometric– have  
45 been used to assess the state of the different physiological sub-systems that constitute the network.  
46 These physiological variables represent either regulated variables or physiological response systems  
47 (Fossion, Rivera, & Estañol, 2018). The lability of the values of physiological response variables,  
48 and the consequent stability of regulated variables, characterizes the robustness of a complex  
49 homeostatic system that resorts to pathological states only in order to preserve vital variables (Kitano  
50 et al., 2004). Thus, homeostasis can be established by the interplay between physiological variables,  
51 allowing its study through a metabolic physiological network.

52  
53 Over time, the physiological compensatory systems that maintain homeostasis become worn down  
54 due to the cumulative impact of metabolic insults, transitioning from healthy to maladaptive states  
55 that precede disease onset (Stephens et al., 2020). An already existing medical notion of this system-  
56 wide progression of states before the overt onset of disease is metabolic syndrome (MetS), whose  
57 prevalence increases strongly with age (Hildrum et al., 2007) and unhealthy lifestyles. At early  
58 stages, MetS biomarkers indicate invisible alterations, wherein homeostasis can still be preserved  
59 (Huang, 2009). Insulin resistance, dyslipidemia, endothelial dysfunction, prothrombotic,  
60 proinflammatory states and, more recently, oxidative stress are then employed to diagnose a  
61 condition of increased cardiometabolic risk (Reaven, 1993; Vona et al., 2019). With this in mind,  
62 several medical organizations established operational diagnostic criteria (Xu et al., 2018), starting  
63 with preexisting diagnostic thresholds for each associated disease, and then lowering them in order to  
64 provide a preventive focus for the diagnosis of MetS (Parikh & Mohan, 2012). In the continued  
65 presence of metabolic insults, as each physiological regulatory system fails, the cascade is absorbed  
66 downstream by the next system. Eventually, what were originally reversible pathological states  
67 progress to become irreversible diseases. This is the final stage, characterized by the lability of the  
68 regulated variables, wherein the physiological response systems become overwhelmed. These states  
69 correspond to clinical diseases that were the basis for the first historical descriptions of MetS, where  
70 gross anatomical changes and clinically overt symptoms, comprising obesity, hypertension, gout,  
71 atherosclerosis and obstructive apnea were first associated (Enzi et al., 2003). However, it is usually  
72 on a scale of decades that these physiological interactions change substantially. Disease appears only  
73 once the robustness of the metabolic physiological network is broken, and regulated variables lose  
74 their tight control.

75  
76 The current approach to determining metabolic health relies on using the thresholds of individual  
77 biomarkers, without considering the overall physiological network itself. As threshold values are the  
78 result of a compromise between sensitivity and specificity, they must be tailored adequately for both  
79 screening and diagnostic purposes in each population (Almeda-Valdes, et al., 2016). However,  
80 current thresholds consider neither age stratification nor the duration of the pathological states,  
81 resulting in medical interventions that are targeted towards single variables and only late in life  
82 (Easton et al., 2019). Furthermore, standard of care for these complex states is no different from the  
83 treatment of each of its individual components (Kahn, 2007). Although targeted approaches for age  
84 have been proposed, for providing further insight on the etiology of risk factors and guide disease-  
85 prevention strategies (Xu et al., 2019; Leatherdale, 2015; Leventhal, Huh, & Dunton, 2014), it has

86 been argued that the principle utility of MetS as a concept relies on the preventive nature of its scope,  
87 and the idea that single interventions could improve simultaneously all of the current five MetS  
88 criteria (Vassallo, Driver, & Stone, 2016). However, there is still doubt as to how to weight the risk  
89 associated with each factor, or their combinations (Sattar, 2008). Indeed, given the increasing  
90 abundance of metabolic biomarkers that predict disease, there is not even a universal consensus on  
91 which criteria should be included and excluded in the first place in order to best assess metabolic  
92 health (O'Neill & O'Driscoll, 2015). As metabolic health is an emergent property, arising from the  
93 interaction of multiple physiological systems over time, the framework of complexity provides the  
94 means for a whole-system analysis (Haring et al., 2012; Lusic, Attie, & Reue, 2008; Sun et al., 2012),  
95 rather than a reductionist variable-by-variable approach. In previous work (Stephens et al., 2020), we  
96 considered how ageing was an important driver of metabolic change across a wide variety of  
97 metabolic biomarkers (anthropometric, fasting blood test and vital signs measurements), considering  
98 each one individually and noting a substantial degree of heterogeneity as to the impact of aging  
99 across them. In contrast, in the present study, we have used networks of these biomarkers as a means  
100 to give a more holistic, systems-biology perspective in order to demonstrate how the changes in the  
101 coupling between regulated variables and those regulatory systems that try to maintain homeostasis  
102 lead to metabolic health changes over a lifetime. In particular, in this paper, we will use complex  
103 physiological networks to better understand these interactions, constructing a data-driven network of  
104 biomarkers that can be used to characterize homeostasis and how it changes as a function of age.  
105

## 106 **2. Results**

### 107 **2.1 Demographic description of the population**

108 A general description of our study population ( $n=2572$ ), and the distinct age groups is provided in  
109 Table 1. The mean age of the participants was 38 years old (standard deviation,  $SD=15$ , range from  
110 18 to 81 years old). Our population sample was predominantly female (65%). This predominance  
111 was preserved across all of the age groups considered with no statistically significant differences  
112 between groups. Our population sample comes mainly from the metropolitan region of Mexico City  
113 (93%), with the remaining participants from neighboring states. Educational level proportions  
114 changed within the age groups, with an increasing trend for postgraduate and basic education (at  
115 most 12 years of study), and a decreasing trend for undergraduate education, that are illustrative of  
116 the population composition within the sample (Table 1). We found that MetS prevalence, as defined  
117 by the criteria in (Alberti et al., 2009), increased significantly by age (under a chi-squared test for  
118 trend  $p<0.001$ ), beginning with a prevalence of 4% for the first age group (<25 years old), which  
119 increased ten-fold to 47% in the age group from 55 to 65 years old. For adults older than 65 years  
120 old, MetS prevalence is high (43%) but is lower than that from 55 to 65, however, this difference  
121 between groups is not statistically significant ( $X^2(1, N = 659) = 0.14, p = 0.7$ ).

### 122 **2.2 Physiological variables and pathological state prevalence change with age**

123 To examine whether this increase in MetS prevalence with age was due to an increment in the mean  
124 values of the physiological variables or to an increase in the tail of the distribution above the cut-off  
125 values (Table 2), linear regressions and chi-squared tests for trends were evaluated (Table 3). Most of  
126 the physiological variables (fasting glucose, HbA1c, LDL cholesterol, triglycerides, urea, creatinine,  
127 waist, weight, systolic and diastolic blood pressure) increased progressively with age, having a  
128 statistically significant positive linear regression slope, whereas height and axillar temperature  
129 decreased, being associated with a statistically significant negative linear regression slope. In  
130 contrast, three physiological variables: basal insulin, HDL cholesterol, and uric acid, showed no

131 linear changes as a function of age. Following the trend of their respective physiological variables,  
132 the prevalence of pathological states also grew with age, with one exception: high temperature. While  
133 changes in the mean values of the physiological variables as a function of age were considerably  
134 smaller, as shown by the slopes in the linear regressions, the proportion of the population above the  
135 cut-off values for the pathological states increased substantially (Table 3). For the physiological  
136 variables, waist circumference, weight, systolic and diastolic pressure had the greatest regression  
137 coefficients as a function of age. Regarding the prevalence of pathological states, overweight, low  
138 estimated glomerular filtration rate (eGFR), and hyperglycemia, had the greatest increase as a  
139 function of age, followed by high blood pressure, high LDL, hypertriglyceridemia, high HbA1c, and  
140 azotemia. Age had a widespread influence on most of the components of MetS, whether regarded as  
141 continuous or as categorical variables. The prevalence of low HDL and hyperuricemia changed with  
142 age, although this trend was not detected by a linear regression.  
143

### 144 **2.3 Metabolic modules can be identified within the network**

145 To investigate how metabolic physiological components are grouped within the networks, we  
146 employed two strategies, either identifying largest cliques or finding clusters within the networks (see  
147 Figure 1). For the first strategy, the largest cliques method shows the biggest possible, maximally  
148 connected subgraphs of a network, indicating which components go hand in hand most frequently  
149 across distinct age groups (Figure 1C and 1D). For the physiological network, weight, waist  
150 circumference, uric acid, systolic and diastolic blood pressures appeared most frequently in the major  
151 cliques (Figure 1C). In the pathological states network, insulin resistance, hypertriglyceridemia,  
152 overweight and hyperglycemia were most frequently found to occur within the largest cliques (Figure  
153 1D). For the second strategy, the networks were assorted into different clusters, using the Louvain  
154 algorithm (Blondel et al., 2008) for the physiological network, or the Spinglass algorithm (Reichardt  
155 & Bornholdt, 2006) for the pathological states network (Figure 1E and 1F). Four main clusters were  
156 found in the physiological network (Figure 1E), with the main cluster associated with weight,  
157 followed by a cluster around urea. An intermediary cluster was found around glucose and HbA1c,  
158 while systolic and diastolic blood pressure remained separated from the rest. For the pathological  
159 states network, the main cluster was around hyperglycemia and the second was around low eGFR,  
160 with an intermediate cluster around high blood pressure and high temperature (Figure 1F). The  
161 metabolic components within these clusters were related by metabolic pathways, establishing  
162 metabolic modules.  
163

164 Both strategies lead to a selection of nodes that differs from current MetS criteria (Figure 1A and  
165 1B). While waist and weight are frequently part of the largest clique of the network, they are often  
166 clustered separately from the metabolic components of triglycerides and glucose. Triglycerides, both  
167 as a physiological variable or as pathological state, are frequently part of the largest cliques and  
168 belong to the main cluster of the networks. Hyperglycemia, on the other hand, is part of the main  
169 cluster only in the pathological states network and is frequently part of largest cliques but is not part  
170 of the largest cliques nor of the main cluster as a physiological variable (glucose). Systolic and  
171 diastolic blood pressures are also frequently part of the largest cliques, but only as physiological  
172 variables and not as a pathological state. They belong mainly to the cluster of overweight as  
173 pathological states, but are in an independent cluster as physiological variables. Finally, HDL  
174 cholesterol as a physiological variable was seldom part of the largest cliques, however, it was part of  
175 the main cluster in the pathological states network.  
176

### 177 **2.4 The role of metabolic biomarkers within the network across a lifetime**

178 The relations between the physiological variables and pathological states within the networks change  
179 with age. We observed that obesity, whether as proxied by the weight and waist circumference  
180 physiological variables, or as the overweight pathological state, is the main influencer in the network  
181 as measured by eigencentality, a role which remained stable across all age groups (Figure 2A and  
182 2C). In contrast, physiological variables with characteristically tight homeostatic control, like  
183 glycemic variables and temperature, were uninfluential in the network (Figure 2C). For the  
184 pathological states network, the largest influence, as measured by hubscore (a generalization of  
185 eigencentality for directed graphs), was exerted by overweight, with the components of dyslipidemia  
186 becoming less influential from 25 to 34 years old onwards, while the pathological states associated  
187 with low estimated glomerular filtration rate (low eGFR) steadily became more relevant above 65  
188 years old (Figure 2B and 2D). Gatekeeping biomarkers of the flow between systems were uric acid,  
189 insulin, HbA1c and HDL in the physiological network, while hypertriglyceridemia, insulin  
190 resistance, hyperglycemia and high HbA1c were the main intermediaries between pathological states  
191 (Figure 2E and 2F). Unlike eigencentality values, flow betweenness values change profoundly as a  
192 function of age (Figure 2E and 2F).  
193

## 194 **2.5 Whole network topology as a biomarker for metabolic homeostasis**

195 As well as local properties of the physiological variables and pathological states networks, global  
196 properties also change with age. Topological properties of these networks for all the age groups are  
197 summarized in Table 4. Noticeably, for the pathological states network, we found that reciprocity  
198 was lower than would be expected, while transitivity of the networks was greater than that expected  
199 for comparable networks of the same size, number of links or dyads (Table 4). Characteristic path  
200 length was lower than would be expected for random networks. Moreover, the local transitivity of  
201 physiological variables reaches a peak in the life decade between 25 and 34 years old, and from then  
202 on, the transitivity begins to decrease (Figure 3A and 3C). However, this decrease is not the result of  
203 a reduction in the weighted degree distribution (strength) of the correlations within the network,  
204 which are similar across all age groups (Figure 3E), instead it is related to an increase in the number  
205 of edges within the network, as presented by network density (Table 4). In other words, the  
206 organization of the physiological variables changed independently from the strength of the  
207 relationships between the variables. Over a lifetime, nodes within a cluster tend to connect more  
208 within themselves rather than outside the cluster. This topological change results in a modularity  
209 increase in the physiological network (Figure 3D). However, this trend was not shared with the  
210 pathological states network. In this network, there is a trend towards increasing transitivity until the  
211 45 to 54 years old age groups group, and a decrease in older groups (Figure 3B and 3C). Pathological  
212 states became increasingly correlated as a function of age, until reaching a maximum in the decade  
213 between 45 and 54 years old (Figure 3C). This clustering change is related to the weighted degree  
214 distribution of the pathological states network (Figure 3F) and to an increase in the density of the  
215 network (Table 4). In these networks, modularity decreases from the 35 to 44 years old group  
216 onwards (Figure 3D). Three stages become apparent: a healthy stage, where the clustering of both  
217 networks increases; a transition stage, where the clustering of pathological states increases, while the  
218 clustering of physiological variable decreases; and a disease stage, where the clustering of both  
219 networks decreases (Figure 3C). The proportion between clustering coefficient and characteristic  
220 path length in a network can be summarized by the small world index to compare structural changes  
221 in our matching networks of increasing age. For the physiological networks of groups starting below  
222 54 years, the small-world index has values between 1.3 and 1.9, increasing to values above 2 in the  
223 groups above 55 years old. All pathological networks had a greater small world index than the

224 corresponding physiological networks, which increased substantially in the age group above 65 years  
225 old and concurrently with a decrease in the global clustering coefficient.

226

### 227 3 DISCUSSION

228 Metabolic homeostasis loss is the main driver of noncommunicable diseases and their resulting  
229 mortality. These complex diseases involve diverse combinations of biomarkers of risk that occur  
230 more often together than by chance alone (Alberti et al., 2009). Currently, however, only five such  
231 factors are monitored for the assessment of metabolic health (overweight, high triglycerides, low  
232 HDL cholesterol, high systolic blood pressure, and high fasting plasma glucose). By adopting a  
233 network approach, in this study, we have shown that, in reality, not only the level of each individual  
234 factor is important, but also their correlations, both local and global. Local properties of the network  
235 are equivalent to current reductionist approaches, while global properties provide new metrics that  
236 can be used as markers of metabolic health. As allostatic load on body metabolism increases with  
237 age, changes in the ratios between different physiological variables represent the adaptive adjustment  
238 of their corresponding setpoints in order to accommodate an increasing burden of internal failures  
239 and cumulative external insults (Fossion et al., 2018; Goldstein, 2019). Here, we have shown that the  
240 number of correlations present within the networks, represented as network density (Table 4), the  
241 number of connections of each node, represented as the node's degree, and the strength of the  
242 correlation, represented as weighted degree, all change gradually across age groups and reflect this  
243 adaptive adjustment (Figure 3). Therefore, topological properties that emerge from the structure of  
244 the networks reflect how whole-system interactions within the physiological network change over a  
245 lifetime and, in particular, show how, as age increases, the loss of metabolic homeostasis is revealed  
246 by these changes. For example, local weighted transitivity measures the probability that the  
247 neighbors of a node are connected among themselves. This measure has the advantage of being  
248 largely independent from the size of the network (Barabási et al., 2003). Changes in this metric give  
249 insight into how the cumulative impact of metabolic insults increases and decreases the relations  
250 between physiological variables and pathological states. At the global level, transitivity and the  
251 clustering coefficient of the network are two indicators of how the network's connections become  
252 aggregated or disaggregated as a function of age. Therefore, these changes in the networks' structure  
253 echo the underlying homeostatic changes.

254

255 The transition from health to disease, in the case of complex diseases, can be described by three-state  
256 models (Chen et al., 2017). In the healthy stage, regulated variables are kept within strict bounds and  
257 physiological response systems increase their activity proportionally in order to compensate the  
258 impact of interaction with the environment. In the transition stage (from 35 to 54 years old) regulated  
259 variables increase their correlation with their physiological response system as metabolic insults are  
260 not fully compensated. At this stage internal malfunctions can be buffered, but at the expense of the  
261 development of pathological states, that then begin to correlate, leading to an ever increasing burden  
262 (Figure 3). Finally, homeostasis is lost, and pathological states lead to disease onset in an irreversible  
263 fashion, resulting in a decrease in the clustering of both network types. Regulated variables are now  
264 fully dysregulated from their corresponding regulatory system variables and correlations are lost. Our  
265 results show that the transition from health to disease is reflected in our topological metrics as a  
266 result of the changes in the correlations between physiological variables and the corresponding  
267 association between pathological states. The different network metrics we evaluated show that our  
268 networks are not random (Table 4). Although a formal, large-scale topological characterization of our  
269 physiological networks falls beyond the scope of this work, and would potentially require the  
270 addition of many more variables, it is interesting to point out that the observed properties of scale  
271 free and small world are properties that are frequently found in complex biological systems (Song et  
272 al., 2005). It has been argued that these topologies confer properties of network robustness and

273 adaptability that are desirable as properties with a homeostatic interpretation (Fossion et al., 2018;  
274 Toledo-Roy, Rivera, & Frank, 2019). Nevertheless, considering the wide structural diversity found in  
275 real-world networks, classification of these complex systems remains an active area of development  
276 (Broido & Clauset, 2019; Hilgetag & Goulas, 2016).

277  
278 Individual biomarkers were described in the context of the network through centrality measurements  
279 of influence and intermediacy. The important influence of weight on the metabolic network was  
280 found in both network approaches and was sustained across all age groups (Figure 2). Additionally,  
281 weight-associated physiological variables and their corresponding pathological states were most  
282 frequently embedded within the largest cliques. Both these results exhibit the central role of weight  
283 inside the metabolic networks. This has been confirmed in a large cross-sectional study, where long  
284 term sustained weight loss was seen to improve overall metabolic risk (Kneel et al., 2018). However,  
285 some classically established MetS components, such as HDL cholesterol, are seldom present within  
286 the largest cliques, indicating a more peripheral role within this network. Some of the biomarkers we  
287 used have a high flow betweenness in the network, suggesting that they behave as an “exchange  
288 currency” among several metabolic subsystems. This was the case for triglycerides, insulin, uric acid  
289 and glucose, whether considered as physiological parameters or as pathological states (Figure 2).  
290 This suggests that they are key components in the transmission of disruptions between different  
291 metabolic subsystems. Additionally, these metabolic subsystems, as identified by our clustering  
292 strategies, are also those that would be considered as the natural ones from a medical perspective  
293 (Chan & Loscalzo, 2012; Goh et al., 2007). Our results show that different, relatively independent,  
294 metabolic modules arise, that communicate through some gatekeeping exchange molecules. With  
295 age, this modularity increases in the case of the physiological variables network (Figure 3C). Such  
296 modularity is a measure of how much the networks tend towards a community structure.  
297 Furthermore, there is a strong correspondence between the clusters that were found in the  
298 physiological variables network and those found in the pathological states network, suggesting that  
299 the associated pathological states emerged from the underlying relationships between the  
300 corresponding physiological variables and are, therefore, not just a byproduct of chance or prevalence  
301 alone. These two approaches complement each other, reinforcing their respective conclusions where  
302 both reach similar results. This was the case for the clustering of metabolic components in both the  
303 physiological variables networks, the pathological states networks (Figure 1E and 1F), and the  
304 corresponding centrality measurements (Figure 2).

305  
306 Finally, it is worth mentioning that another advantage of network analysis is that it can be used as  
307 part of an automated process for discovering and analyzing patterns in large datasets, with the  
308 assistance of experts to ensure a relevant and adequate interpretation (Merico, Gfeller, & Bader,  
309 2009). In this way, networks can be extended in an iterative process in order to accommodate new  
310 biomarkers in a way that can both enrich and refine the generated network models (Aittokallio &  
311 Schwikowski, 2006). Our work provides the layout for an evidence-based rationale for adding (or  
312 replacing) other CVD risk factors (e.g., CRP or family history) to the definition of MetS (Kahn et al.,  
313 2005). For instance, the physiological variables network does not rely on the particular values of cut-  
314 offs and illustrates that some variables that are not monitored currently, such as uric acid, may be  
315 better early indicators of metabolic burden. It is important to notice that uric acid is not used  
316 traditionally as a biomarker of metabolic disorders, even when in our network analysis it is more  
317 frequently embedded within the largest cliques than blood pressure components, triglycerides and  
318 HDL cholesterol (Figure 1C). This result adds to the growing body of literature that considers uric  
319 acid to be a relevant biomarker in MetS (Kanbay et al., 2016). In summary, the physiological  
320 network approach to metabolic homeostasis is capable of providing useful insights on whole-system  
321 function that are inaccessible through reductionist approaches.

322

## 323 **Conclusion**

324

325 Changes in network topology are global indicators of metabolic homeostasis and do not rely on any  
326 single parameter or threshold but, instead, assess the behavior of the whole system. Thus, this novel  
327 conceptualization of homeostatic health allows for a more holistic comprehension of a person's  
328 physiology. Structural properties, such as weighted transitivity or the small-world index, may then  
329 serve as topological indicators of health for the metabolic physiological network.

330

## 331 **4. Methodology**

### 332 *4.1 Ethical and human research considerations*

333 This study was carried out in accordance with current regulation contained in the Mexican Official  
334 Normativity, NOM-012-SSA3-2012. The Ethics Committee of the Facultad de Medicina of the  
335 UNAM approved the procedures and protocols for this study under project FM/DI/023/2014, all the  
336 participants provided a written informed consent.

### 337 *4.2 Study population and age sub-groups*

338 We performed a transversal, community-based study of an ethnically and educationally diverse  
339 sample within a large public university, comprising 2572 participants. Each participant answered a  
340 health questionnaire and underwent vital signs, and anthropometric measurements along with fasting  
341 blood tests. This resulted in a multi-dimensional data set. The sampling was performed in successive  
342 steps from 2014 to 2019. The global sample was divided into 6 groups of increasing age, beginning  
343 with less than 25 years, and increasing in decades up to above 65 years of age. As a result, we  
344 obtained 6 age groups (see Table 1).

### 345 *4.3 Anthropometric measurements and laboratory procedures*

346 All tests were performed in the morning during a 4-hour period (from 6 a.m. to 10 a.m.) after  
347 verifying fasting and general status. Anthropometric measurements (weight, height, waist and hip  
348 circumferences) and vital signs (blood pressure and temperature) were taken by trained medical staff  
349 using standard procedures (Whelton et al., 2018; WHO, 1995). Blood samples were obtained from  
350 participants who had fasted for 8 to 12 hours. Samples were stored at 4-5 °C and submitted for  
351 chemical analysis of glucose, glycated hemoglobin (HbA1c), insulin, triglycerides, total cholesterol,  
352 HDL cholesterol, LDL cholesterol, uric acid and creatinine. Fasting plasma glucose was measured  
353 using spectrophotometry and potentiometry with a hexokinase kit (amorting PIPES, NAD,  
354 Hexokinase, ATP, Mg<sup>2+</sup>, G6P-DH; AU 2700 Beckman Coulter R). HbA1c was measured with High  
355 Performance Liquid Chromatography (HPLC) analysis with the Variant R Turbo kit 2.0, which  
356 consisted of 2 buffers and 1 wash solution. Fasting plasma insulin concentrations were determined  
357 using Chemiluminescence (Access Ultrasensitive Insulin, Unicell Dxl 800 Beckman Coulter R,  
358 Sensitivity: 0.03-300 U/mL). The lipid profile was obtained with enzymatic colorimetric assay  
359 (glycerol phosphate oxidase, cholesterol oxidase, accelerator-selective, detergent, and liquid-selective  
360 detergent). Uric acid was measured using the colorimetric method with uricase enzymatic OSR6698,  
361 system AU2700/5400, Beckmann Coulter R. This resulted in a set of 15 non-derivative, independent,  
362 continuous, physiological variables. From the original data set, 14 particular values associated with  
363 distinct variables were excluded, based on two main criteria:



- 364
- 1. Outliers based on physiologically improbable values that are most likely to be erroneous as they would be incompatible with life. This included removing three values of blood pressure, 365 three values of axillar temperature, two glucose measurements, two values of HbA1c, and one 366 each of uric acid, and LDL.
  - 2. Anthropometric measurements which were inconsistent between themselves. For example, 367 exceeding high values of waist circumference in an underweight participant. Thirteen 368 values of waist and one value of height were discarded on this account. 369 370

#### 371 *4.4 Pathological states assessment*

372 From these physiological variables, thresholds were defined in order to distinguish normal values  
373 from abnormal values, thus categorizing health status or a pathological state (Table 2). We would like  
374 to emphasize that the thresholds used here are not diagnostic of disease, instead they are low enough  
375 values that indicate increased risk. Most of our criteria are backed up by major health societies and  
376 organizations, however, when a consensus was not available, we used literature-based cut-off values  
377 that best correlated with the increased risk-prevention view of the harmonized MetS criteria (Alberti  
378 et al., 2009; American Diabetes Association, 2020; Esteghamati et al., 2009; Khanna et al., 2012;  
379 Levin et al., 2013; Mach et al., 2019; Sund-Levander, Forsberg, & Wahren, 2002; Tyagi & Aeddula,  
380 2019; Whelton et al., 2018). Thus, the pathological states described here are not diseases per se, but  
381 an indication that physiological values do not represent normal health status. Three of the  
382 physiological variables that we measured do not have a pathological state by themselves alone. For  
383 instance, high blood pressure was determined by either elevated systolic or diastolic values. For  
384 insulin and creatinine, two derived indices were calculated: Homeostasis Model Assessment Insulin  
385 Resistance index (HOMA-IR) (Wallace, Levy, & Matthews, 2004) for the pathological state of  
386 insulin resistance, and eGFR for chronic kidney disease (Levin et al., 2013).

#### 387 *4.5 Network modelling*

388 It has been observed that two models of metabolism are possible. In the first one metabolic risk  
389 increases progressively as an increasing function of certain physiological variables (Knell et al.,  
390 2018; Wijndaele et al., 2006). In the second one, metabolic homeostasis is bimodal, and as such, risk  
391 increases significantly only upon exceeding certain thresholds associated with the diagnosis of the  
392 pathological state (Alberti et al., 2009; Stern et al., 2005). Therefore, to encompass both possibilities,  
393 we created a network model for both employing accessible biomarkers that probe the underlying  
394 metabolism.

395  
396 In the first case, the coupling between two physiological variables can be explored through their rate  
397 of change in the population. Here, a monotonic association would be found between those variables  
398 that interact directly or indirectly within the physiological network. We tested the physiological  
399 variables datasets for normality using the Shapiro-Wilk test and screened them for extreme values.  
400 Since the data sets were not normally distributed and had extreme values expected to be real, we  
401 selected the Spearman Rank Correlation (Batushansky, Toubiana, & Fait, 2016) as a measure of  
402 correlation. We modeled the metabolic physiological network as a continuous association of pairs of  
403 variables. For this monotonic correlation model, a correlation matrix was constructed for the 15  
404 chosen physiological parameters (Figure 4). Significant correlations were established at a value of  
405  $p < 0.001$ , indicating that the relation does not support the null hypothesis that the independent and

406 dependent variables are unrelated. The weight of the Spearman's rho correlation was squared in order  
407 to obtain only positive values.

408

409 For the second case, a pathological states network was constructed using currently accepted  
410 thresholds from the literature. Here, cut-off values allow the comparison of the tails of the  
411 distributions across age groups. The objective here was to indicate whether the participants within the  
412 tail of the distribution of one physiological variable have a greater probability of being also in the tail  
413 of the distribution of another physiological variable than would be explained by the prevalence of the  
414 pathological states alone. This probability of being in a pathological state B given that the individual  
415 is in a pathological state A was described using the following binomial test:

416

$$\varepsilon = \frac{N_x(P(c|x) - P(c))}{\sqrt{N_x(1 - P(c))P(c)}}$$

417 This test is not necessarily reciprocal, thus giving a weighted directionality to the relationship. If a  
418 pathological state is probably the origin of another, their  $\varepsilon$  value would be expected to be high in that  
419 direction, while it could be low in the opposite one. For this binomial test the null hypothesis is that  
420 the probability of presenting condition C is not affected by having condition X. The statistical  
421 significance,  $\varepsilon$ , is a measure of the extent to which the null hypothesis is verified by the data. In the  
422 circumstance, which is valid here, where the binomial distribution can be approximated by a normal  
423 distribution,  $\varepsilon > 1.96$  corresponds to the standard 95% confidence interval (Easton, Stephens, &  
424 Angelova, 2014). As the pathological states network is based upon thresholds accepted by medical  
425 consensus, this network adheres well to the known progression of MetS. However, the employment  
426 of cut-off values for asserting associations between states may result in an association towards the  
427 most sensitive, low thresholds. Exceedingly low thresholds can make pathological states seem more  
428 prevalent and bias the direction of  $\varepsilon$  (Easton et al., 2019). In consequence, care was taken for the  
429 selection of thresholds consistent with the preventive scope of MetS.

430

431 In summary, for the first case, physiological variables are monotonically correlated along all their  
432 biologically plausible spectrum. In this scenario the associations between parameters are present even  
433 at healthy values and represent a continuum. For the second case, pathological states are best  
434 regarded as binomial. Upon reaching a threshold, the association between these states either appears  
435 or increases significantly. This second model resembles the current interpretation of MetS, as it  
436 requires a co-occurrence higher than would be expected by chance and contemplates cutoff values as  
437 all or nothing states (Alberti et al., 2009). Finally, we used groups of individuals of different ages in  
438 order to explore the progressive changes that occur during the aging process and which result in an  
439 increasing prevalence of MetS. From the systems biology perspective, the network structure is a  
440 direct result of the coordination, or lack thereof, of components that are linked by homeostatic  
441 feedback (Goldstein, 2019).

442

#### 443 *4.6 Network construction and statistical analysis*

444 For the construction of our considered networks we used correlation matrices of physiological  
445 variables and pathological states. These matrices were interpreted as weighted adjacency matrices,  
446 where adjacency is represented by the Spearman rhos or the  $\varepsilon$  values between each pair of metabolic  
447 components. The resulting matrices were weighted and undirected for the Pearson correlation matrix  
448 and weighted and directed in the case of  $\varepsilon$  values (Figure 4). For the construction of the Spearman  
449 correlation matrix, data-set normality testing, linear regression and chi-squared tests for trends were

450 all done with Prism 8.1.2(277), GraphPad Software, La Jolla, California USA, [www.graphpad.com](http://www.graphpad.com).  
451 For the network construction RStudio, an R language programming suite and igraph package (Csárdi,  
452 Nepusz, & Airoldi, 2016; R Core Team, 2020; RStudio Team, 2020).

453  
454 Nodes within a network can be ranked according to several centrality definitions that fall into two  
455 main groups, radial measures and medial measures. Inferring causality exclusively from centrality  
456 within networks, requires caution, although eigencentrality has been found to be the best centrality  
457 measurement for this purpose, especially for small networks with less than 30 nodes (Dablander &  
458 Hinne, 2019). Therefore, we selected eigenvector for undirected networks and hubscore for directed  
459 networks as radial measures. For medial measures we decided to use flow betweenness. These  
460 centrality values allow for a direct comparison of either the influence of nodes (radial measure) or  
461 gatekeeping (medial measure) within the network (Borgatti & Everett, 2006). Eigencentrality  
462 corresponds to the value of the first eigenvector of the graph adjacency matrix and was interpreted as  
463 a measure of influence within the undirected networks. These values were obtained using the `event`  
464 function from the SNA package (Butts, 2019). For directed networks, hub score and authority score,  
465 are a better way of representing influence as these measures take into account the directionality of the  
466 links. Hub scores are defined as the principal eigenvectors of  $A \cdot t(A)$ , where  $A$  is the adjacency  
467 matrix of the network. These values were calculated with the `hub_score` function from the igraph  
468 package (Kleinberg, 1998). Flow betweenness was used as a measurement of intermediation within  
469 the network. Flow betweenness was calculated using the `flowbet` function from the SNA package. In  
470 order to test if the eigencentrality and flow betweenness values obtained would be seen in a random  
471 graph with the same number of vertices, edges or dyads, univariate conditionally uniform graph tests  
472 (CUG test) were employed with the `cug.test` function from the SNA package.

473  
474 Networks can contain subgraphs, subsets of vertices with a specific set of edges connecting them  
475 within the original graph, that are of particular relevance (Aittokallio & Schwikowski, 2006). We  
476 sought two particular subgraphs within our models: First, the graph corresponding to those variables  
477 associated with the current definition of MetS, and second, the largest clique within the graph. As  
478 there may be more than one combination of nodes that result in a largest clique, we registered the  
479 number of times each node appeared within a possible largest clique. These maximally connected  
480 subgraphs - largest cliques - were identified using the `largest_cliques` function of the igraph package  
481 (Eppstein, Löffler, & Strash, 2010). Largest clique and current MetS variables were highlighted as  
482 subgraphs, along with the graph diameter.

483  
484 The largest clique is the biggest, maximally connected subgraph of a graph and contains vertices such  
485 that each vertex is connected with every other vertex of the clique. This gives an idea of which  
486 vertices go hand in hand in each network (Pavlopoulos et al., 2011). On the other hand, a cluster, as  
487 defined using a suitable clustering algorithm, is a group of vertices within a graph that are more  
488 densely connected to one another than to other vertices (Csárdi et al., 2016). There are several  
489 alternative algorithms for discovering communities of vertices within graphs. For community  
490 detection within the networks we used two different algorithms. For the Pearson model, the Louvain  
491 algorithm was employed as a heuristic method based on modularity optimization, with the  
492 `cluster_louvain` function from the igraph package (Blondel et al., 2008). In the  $\epsilon$  model, the spinglass  
493 community algorithm selects those nodes with the greatest probability to be found in the same state  
494 concurrently, with the `cluster_spinglass` function from the igraph package (Reichardt & Bornholdt,  
495 2006). These two approaches to identifying related biomarkers are complementary - clustering  
496 strategies maximize the modularity of the network, while largest-clique identification maximizes the  
497 transitivity of the largest possible subgraph.

498

499 Topological properties were assessed as follows: Density, reciprocity and characteristic path length  
500 of the networks were calculated using the igraph package. For the calculation of the weighted  
501 transitivity and the clustering coefficient in directed and undirected weighted networks the  
502 DirectedClustering package was employed (Clemente & Grassi, 2018). The Small world index, as  
503 calculated by qgraph, was used as a summary metric of the network topology (Watts & Strogatz,  
504 1998). CUG tests were also performed for network density, reciprocity, transitivity and characteristic  
505 path length.

## 506 **5 Conflict of Interest**

507 The authors declare that the research was conducted in the absence of any commercial or financial  
508 relationships that could be construed as a potential conflict of interest.

## 509 **6 Author Contributions**

510 CRS designed the project and obtained the funding. ABM conceived this work, implemented the  
511 network modelling and with JFE and ALR performed all the statistical and network analysis. ABM,  
512 RMT, and LC contributed with the acquisition and the medical interpretation of the data. All authors  
513 contributed with the manuscript revision, read and approved the submitted version.

## 514 **7 Funding**

515 This work was partially supported by CONACyT through the Fronteras grants FC-2015-2/1093 and  
516 the Universidad Nacional Autónoma de México through DGAPA Programa de Apoyo a Proyectos de  
517 Investigación e Innovación Tecnológica (PAPIIT) IG101520, AV100120, IN113619, and PAPIME  
518 PE103519. We also acknowledge support from SECTEI CDMX grant SECIT/093/2018 and a  
519 donation from Academic Relations, Microsoft Corporation.

## 520 **8 Acknowledgments**

521 Antonio Barajas is a doctoral student from Programa de Doctorado en Ciencias Biomédicas,  
522 Universidad Nacional Autónoma de México (UNAM) and received fellowship 596756 from  
523 CONACYT. We thank the Instituto Nacional de Ciencias Médicas y Nutrición “Salvador Zubirán”  
524 and the Hospital Juárez de México for the sample processing described in the laboratory procedures.

## 525 **9 Data Availability Statement**

526 The datasets associated with this study can be found publicly available in either csv or database  
527 formats at [<http://project42.c3.unam.mx/>].

528

## 529 **References:**

530

- 531 Aittokallio, T., & Schwikowski, B. (2006). Graph-based methods for analysing networks in cell  
532 biology. *Briefings in Bioinformatics*, 7(3), 243–255. <https://doi.org/10.1093/bib/bbl022>  
533 Alberti, K. G. M. M., Eckel, R. H., Grundy, S. M., Zimmet, P. Z., Cleeman, J. I., Donato, K. A., ...  
534 Smith, S. C. (2009). Harmonizing the metabolic syndrome: A joint interim statement of the  
535 international diabetes federation task force on epidemiology and prevention; National heart,  
536 lung, and blood institute; American heart association; World heart federation; International .  
537 *Circulation*, 120(16), 1640–1645. <https://doi.org/10.1161/CIRCULATIONAHA.109.192644>  
538 Almeda-Valdes, P., Aguilar-Salinas, C. A., Uribe, M., Canizales-Quinteros, S., & Méndez-Sánchez,

- 539 N. (2016). Impact of anthropometric cut-off values in determining the prevalence of metabolic  
540 alterations. *European Journal of Clinical Investigation*, 46(11), 940–946.  
541 <https://doi.org/10.1111/eci.12672>
- 542 American Diabetes Association. (2020, January 1). 2. Classification and Diagnosis of Diabetes:  
543 Standards of Medical Care in Diabetes-2020. *Diabetes Care*. NLM (Medline).  
544 <https://doi.org/10.2337/dc20-S002>
- 545 Barabási, A.-L., Dezső, Z., Ravasz, E., Yook, S., & Oltvai, Z. (2003). Scale-Free and Hierarchical  
546 Structures in Complex Networks. In *AIP Conference Proceedings* (Vol. 661, pp. 1–16). AIP  
547 Publishing. <https://doi.org/10.1063/1.1571285>
- 548 Batushansky, A., Toubiana, D., & Fait, A. (2016). Correlation-Based Network Generation,  
549 Visualization, and Analysis as a Powerful Tool in Biological Studies: A Case Study in Cancer  
550 Cell Metabolism. *BioMed Research International*, 2016. <https://doi.org/10.1155/2016/8313272>
- 551 Blondel, V. D., Guillaume, J.-L., Lambiotte, R., & Lefebvre, E. (2008). Fast unfolding of  
552 communities in large networks. *Journal of Statistical Mechanics: Theory and Experiment*,  
553 2008(10), P10008.
- 554 Borgatti, S. P., & Everett, M. G. (2006). A Graph-theoretic perspective on centrality. *Social*  
555 *Networks*, 28(4), 466–484. <https://doi.org/10.1016/J.SOCNET.2005.11.005>
- 556 Broido, A. D., & Clauset, A. (2019). Scale-free networks are rare. *Nature Communications*, 10(1), 1–  
557 10. <https://doi.org/10.1038/s41467-019-08746-5>
- 558 Butts, C. T. (2019). sna: Tools for Social Network Analysis. <https://cran.r-project.org/package=sna>
- 559 Chan, S. Y., & Loscalzo, J. (2012, July 20). The emerging paradigm of network medicine in the  
560 study of human disease. *Circulation Research*. Lippincott Williams & WilkinsHagerstown, MD.  
561 <https://doi.org/10.1161/CIRCRESAHA.111.258541>
- 562 Chen, P., Li, Y., Liu, X., Liu, R., & Chen, L. (2017). Detecting the tipping points in a three-state  
563 model of complex diseases by temporal differential networks. *Journal of Translational*  
564 *Medicine*, 15(1), 217. <https://doi.org/10.1186/s12967-017-1320-7>
- 565 Csárdi, G., Nepusz, T., & Airoldi, E. M. (2016). *Statistical Network Analysis with igraph*. Springer.  
566 <https://sites.fas.harvard.edu/~airoldi/pub/books/BookDraft-CsardiNepuszAiroldi2016.pdf>
- 567 Dablander, F., & Hinne, M. (2019). Node centrality measures are a poor substitute for causal  
568 inference. *Scientific Reports*, 9(1), 6846. <https://doi.org/10.1038/s41598-019-43033-9>
- 569 Easton, J. F., Robles-Cabrera, A., Fossion, R., Rivera, A. L., & Stephens, C. R. (2019). Thoughts on  
570 the use of standard cut-off values for physiological health indicators. *AIP Conference*  
571 *Proceedings*, 2090, 50006. <https://doi.org/10.1063/1.5095921>
- 572 Easton, J. F., Stephens, C. R., & Angelova, M. (2014). Risk factors and prediction of very short term  
573 versus short/intermediate term post-stroke mortality: A data mining approach. *Computers in*  
574 *Biology and Medicine*, 54, 199–210. <https://doi.org/10.1016/J.COMPBIOMED.2014.09.003>
- 575 Enzi, G., Busetto, L., Inelmen, E. M., Coin, A., & Sergi, G. (2003). Historical perspective: visceral  
576 obesity and related comorbidity in Joannes Baptista Morgagni’s ‘De Sedibus et Causis  
577 Morborum per Anatomen Indagata.’ *International Journal of Obesity*, 27(4), 534–535.  
578 <https://doi.org/10.1038/sj.ijo.0802268>
- 579 Eppstein, D., Löffler, M., & Strash, D. (2010). Listing All Maximal Cliques in Sparse Graphs in  
580 Near-optimal Time. *Algorithms and Computation*, 6506, 403–414.  
581 <http://arxiv.org/abs/1006.5440>
- 582 Esteghamati, A., Ashraf, H., Esteghamati, A.-R., Meysamie, A., Khalilzadeh, O., Nakhjavani, M., &  
583 Abbasi, M. (2009). Optimal threshold of homeostasis model assessment for insulin resistance in  
584 an Iranian population: the implication of metabolic syndrome to detect insulin resistance.  
585 *Diabetes Research and Clinical Practice*, 84(3), 279–287.  
586 <https://doi.org/10.1016/j.diabres.2009.03.005>
- 587 Fossion, R., Rivera, A. L., & Estañol, B. (2018). A physicist’s view of homeostasis: how time series

- 588 of continuous monitoring reflect the function of physiological variables in regulatory  
589 mechanisms. <https://doi.org/10.1088/1361-6579/aad8db>
- 590 Goh, K.-I., Cusick, M. E., Valle, D., Childs, B., Vidal, M., & Szló Barabá, A.-L. (2007). *The human*  
591 *disease network*. [www.pnas.org/cgi/content/full/](http://www.pnas.org/cgi/content/full/)
- 592 Goldstein, D. S. (2019). How does homeostasis happen? Integrative physiological, systems  
593 biological, and evolutionary perspectives. *American Journal of Physiology. Regulatory,*  
594 *Integrative and Comparative Physiology*, 316(4), R301–R317.  
595 <https://doi.org/10.1152/ajpregu.00396.2018>
- 596 Haring, R., Rosvall, M., Völker, U., Völzke, H., Kroemer, H., Nauck, M., & Wallaschofski, H.  
597 (2012). A Network-Based Approach to Visualize Prevalence and Progression of Metabolic  
598 Syndrome Components. *PLoS ONE*, 7(6), e39461. <https://doi.org/10.1371/journal.pone.0039461>
- 599 Hildrum, B., Mykletun, A., Hole, T., Midthjell, K., & Dahl, A. A. (2007). Age-specific prevalence of  
600 the metabolic syndrome defined by the International Diabetes Federation and the National  
601 Cholesterol Education Program: the Norwegian HUNT 2 study. *BMC Public Health*, 7(1), 220.  
602 <https://doi.org/10.1186/1471-2458-7-220>
- 603 Hilgetag, C. C., & Goulas, A. (2016). Is the brain really a small-world network? *Brain Structure and*  
604 *Function*, 221(4), 2361–2366. <https://doi.org/10.1007/s00429-015-1035-6>
- 605 Huang, P. L. (2009). A comprehensive definition for metabolic syndrome. *Disease Models &*  
606 *Mechanisms*, 2(5–6), 231–237. <https://doi.org/10.1242/dmm.001180>
- 607 Kahn, R. (2007). Metabolic syndrome: is it a syndrome? Does it matter? *Circulation*, 115(13), 1806–  
608 1810; discussion 1811. <https://doi.org/10.1161/CIRCULATIONAHA.106.658336>
- 609 Kahn, R., Buse, J., Ferrannini, E., Stern, M., American Diabetes Association, & European  
610 Association for the Study of Diabetes. (2005). The metabolic syndrome: time for a critical  
611 appraisal: joint statement from the American Diabetes Association and the European  
612 Association for the Study of Diabetes. *Diabetes Care*, 28(9), 2289–2304.  
613 <https://doi.org/10.2337/DIACARE.28.9.2289>
- 614 Kanbay, M., Jensen, T., Solak, Y., Le, M., Roncal-Jimenez, C., Rivard, C., ... Johnson, R. J. (2016).  
615 Uric acid in metabolic syndrome: From an innocent bystander to a central player. *European*  
616 *Journal of Internal Medicine*, 29, 3–8. <http://www.ncbi.nlm.nih.gov/pubmed/26703429>
- 617 Khanna, D., Fitzgerald, J. D., Khanna, P. P., Bae, S., Singh, M. K., Neogi, T., ... Terkeltaub, R.  
618 (2012). 2012 American College of Rheumatology Guidelines for Management of Gout. Part 1:  
619 Systematic Nonpharmacologic and Pharmacologic Therapeutic Approaches to Hyperuricemia.  
620 <https://doi.org/10.1002/acr.21772>
- 621 Kitano, H., Oda, K., Kimura, T., Matsuoka, Y., Csete, M., Doyle, J., & Muramatsu, M. (2004).  
622 Metabolic Syndrome and Robustness Tradeoffs. *Diabetes*, 53(suppl 3), S6–S15.  
623 [https://doi.org/10.2337/DIABETES.53.SUPPL\\_3.S6](https://doi.org/10.2337/DIABETES.53.SUPPL_3.S6)
- 624 Knell, G., Li, Q., Pettee Gabriel, K., & Shuval, K. (2018). Long-Term Weight Loss and Metabolic  
625 Health in Adults Concerned With Maintaining or Losing Weight: Findings From NHANES.  
626 *Mayo Clinic Proceedings*, 93(11), 1611–1616. <https://doi.org/10.1016/j.mayocp.2018.04.018>
- 627 Leatherdale, S. T. (2015). An examination of the co-occurrence of modifiable risk factors associated  
628 with chronic disease among youth in the COMPASS study. *Cancer Causes & Control*, 26(4),  
629 519–528. <https://doi.org/10.1007/s10552-015-0529-0>
- 630 Leventhal, A. M., Huh, J., & Dunton, G. F. (2014). Clustering of modifiable biobehavioral risk  
631 factors for chronic disease in US adults: a latent class analysis. *Perspectives in Public Health*,  
632 134(6), 331–338. <https://doi.org/10.1177/1757913913495780>
- 633 Levin, A., Stevens, P. E., Bilous, R. W., Coresh, J., De Francisco, A. L. M., De Jong, P. E., ...  
634 Winearls, C. G. (2013). Kidney disease: Improving global outcomes (KDIGO) CKD work  
635 group. KDIGO 2012 clinical practice guideline for the evaluation and management of chronic  
636 kidney disease. *Kidney International Supplements*. Nature Publishing Group.

- 637 <https://doi.org/10.1038/kisup.2012.73>
- 638 Lusis, A. J., Attie, A. D., & Reue, K. (2008). Metabolic syndrome: from epidemiology to systems  
639 biology. *Nature Reviews Genetics*, 9(11), 819–830. <https://doi.org/10.1038/nrg2468>
- 640 Mach, F., Baigent, C., Catapano, A. L., Koskinas, K. C., Casula, M., Badimon, L., ... Patel, R. S.  
641 (2019). 2019 ESC/EAS Guidelines for the management of dyslipidaemias: lipid modification to  
642 reduce cardiovascular risk. *European Heart Journal*. <https://doi.org/10.1093/eurheartj/ehz455>
- 643 Merico, D., Gfeller, D., & Bader, G. D. (2009). How to visually interpret biological data using  
644 networks. *Nature Biotechnology*, 27(10), 921–924. <https://doi.org/10.1038/nbt.1567>
- 645 O’Neill, S., & O’Driscoll, L. (2015). Metabolic syndrome: a closer look at the growing epidemic and  
646 its associated pathologies. *Obesity Reviews*, 16(1), 1–12. <https://doi.org/10.1111/obr.12229>
- 647 Parikh, R., & Mohan, V. (2012). Changing definitions of metabolic syndrome. *Indian Journal of*  
648 *Endocrinology and Metabolism*, 16(1), 7. <https://doi.org/10.4103/2230-8210.91175>
- 649 Pavlopoulos, G. A., Secrier, M., Moschopoulos, C. N., Soldatos, T. G., Kossida, S., Aerts, J., ...  
650 Bagos, P. G. (2011). Using graph theory to analyze biological networks. *BioData Mining*, 4(1),  
651 10. <https://doi.org/10.1186/1756-0381-4-10>
- 652 R Core Team. (2020). R: A language and environment for statistical computing. Viena, Austria: R  
653 Foundation for Statistical Computing. <https://www.r-project.org/>
- 654 Reaven, G. M. (1993). Role of Insulin Resistance in Human Disease (Syndrome X): An Expanded  
655 Definition. *Annual Review of Medicine*, 44(1), 121–131.  
656 <https://doi.org/10.1146/annurev.me.44.020193.001005>
- 657 Reichardt, J., & Bornholdt, S. (2006). Statistical Mechanics of Community Detection. *Physical*  
658 *Review E, Vol. 74, Issue 1, Id. 016110*, 74(1). <https://doi.org/10.1103/PhysRevE.74.016110>
- 659 RStudio Team. (2020). RStudio: Integrated Development for R. *PBC*. Boston, MA: RStudio.  
660 <http://www.rstudio.com/>.
- 661 Sattar, N. (2008). Why metabolic syndrome criteria have not made prime time: a view from the  
662 clinic. *International Journal of Obesity*, 32(S2), S30–S34. <https://doi.org/10.1038/ijo.2008.33>
- 663 Song, C., Havlin, S., & Makse, H. A. (2005). Self-similarity of complex networks. *Nature*,  
664 433(7024), 392–395. <https://doi.org/10.1038/nature03248>
- 665 Stephens, C. R., Easton, J. F., Robles-Cabrera, A., Fossion, R. Y. M., De La Cruz, L., Martinez-  
666 Tapia, R., ... Rivera, A. L. (2020). The impact of education and age on metabolic disorders.  
667 *Frontiers in Public Health*, 8, 180. <https://doi.org/10.3389/FPUBH.2020.00180>
- 668 Stern, S. E., Williams, K., Ferrannini, E., DeFronzo, R. A., Bogardus, C., & Stern, M. P. (2005).  
669 Identification of individuals with insulin resistance using routine clinical measurements.  
670 *Diabetes*, 54(2), 333–339. <https://doi.org/DOI:10.2337/diabetes.54.2.333>
- 671 Sun, L., Yu, Y., Huang, T., An, P., Yu, D., Yu, Z., ... Wang, F. (2012). Associations between  
672 Ionomics Profile and Metabolic Abnormalities in Human Population. *PLoS ONE*, 7(6), e38845.  
673 <https://doi.org/10.1371/journal.pone.0038845>
- 674 Sund-Levander, M., Forsberg, C., & Wahren, L. K. (2002). Normal oral, rectal, tympanic and  
675 axillary body temperature in adult men and women: a systematic literature review. *Scandinavian*  
676 *Journal of Caring Sciences*, 16(2), 122–128. <https://doi.org/10.1046/j.1471-6712.2002.00069.x>
- 677 Toledo-Roy, J. C., Rivera, A. L., & Frank, A. (2019). Symmetry, criticality and complex systems. In  
678 *Symmetries and Order: Algebraic Methods in Many Body Systems: A symposium in celebration*  
679 *of the career of Professor Francesco Iachello* (Vol. 2150, p. 020014). AIP Publishing.  
680 <https://doi.org/10.1063/1.5124586>
- 681 Tyagi, A., & Aeddula, N. R. (2019). Azotemia. StatPearls Publishing, Treasure Island (FL).  
682 <http://europepmc.org/books/NBK538145>
- 683 Vassallo, P., Driver, S. L., & Stone, N. J. (2016). Metabolic Syndrome: An Evolving Clinical  
684 Construct. *Progress in Cardiovascular Diseases*, 59(2), 172–177.  
685 <https://doi.org/10.1016/j.pcad.2016.07.012>

- 686 Vona, R., Gambardella, L., Cittadini, C., Straface, E., Pietraforte, D., Editor, G., & Di Mauro, M.  
687 (2019). Biomarkers of Oxidative Stress in Metabolic Syndrome and Associated Diseases.  
688 *Oxidative Medicine and Cellular Longevity*, 2019, 1–19. <https://doi.org/10.1155/2019/8267234>  
689 Wallace, T. M., Levy, J. C., & Matthews, D. R. (2004). Use and Abuse of HOMA Modeling.  
690 *Diabetes Care*, 27(6), 1487 LP – 1495. <https://doi.org/10.2337/diacare.27.6.1487>  
691 Whelton, P. K., Carey, R. M., Aronow, W. S., Casey, D. E., Collins, K. J., Dennison Himmelfarb, C.,  
692 ... Wright, J. T. (2018). 2017 ACC / AHA / AAPA / ABC / ACPM / AGS / APhA / ASH /  
693 ASPC / NMA / PCNA Guideline for the Prevention, Detection, Evaluation, and Management of  
694 High Blood Pressure in Adults: Executive Summary. *Journal of the American College of*  
695 *Cardiology*, 71(19), 2199–2269. <https://doi.org/10.1016/j.jacc.2017.11.005>  
696 WHO. (1995). *Physical status: the use and interpretation of anthropometry. Report of a WHO Expert*  
697 *Committee. World Health Organization technical report series* (Vol. 854). Switzerland.  
698 Wijndaele, K., Beunen, G., Duvigneaud, N., Matton, L., Duquet, W., Thomis, M., ... Philippaerts, R.  
699 M. (2006). A continuous metabolic syndrome risk score: Utility for epidemiological analyses  
700 [6]. *Diabetes Care*, 29(10), 2329. <https://doi.org/10.2337/dc06-1341>  
701 Xu, H., Li, X., Adams, H., Kubena, K., & Guo, S. (2018). Etiology of Metabolic Syndrome and  
702 Dietary Intervention. *International Journal of Molecular Sciences*, 20(1), 128.  
703 <https://doi.org/10.3390/ijms20010128>  
704

## 705 Figure Captions

### 707 Figure 1. Physiological subsystems identified by Data-driven association.

708 Representative networks (A) for the physiological variables network and (B) for the pathological  
709 states network. Physiological variables and pathological states clusters are shown as largest cliques  
710 (blue connections), and, as clusters (nodes within color highlighted areas). In both metabolic  
711 physiological networks, the red subgraph shows the currently accepted MetS components. The  
712 diameter of the network - the two furthest nodes path - is highlighted in purple. (C) Frequency of  
713 physiological variables composing the largest clique of each age group network. (D) Frequency of  
714 pathological states fully associated within largest cliques as shown by the pathological states  
715 network. The frequency of appearance of a node pertaining to a certain cluster (membership) was  
716 registered. Since 7 networks were generated (all participants, and 6 age-range groups), a node  
717 belonging to the same cluster across the entire lifespan would reach a value of 7. In (E), the  
718 frequency value represents how many times a node is part of the same cluster for the physiological  
719 variables, where the Louvain algorithm was used to determine clusters. Three main clusters appear,  
720 with blood pressure variables making a fourth. (F) Cluster membership of pathological states using  
721 the spinglass community algorithm that selects the group of nodes most likely to be found in the  
722 same state. Three main clusters appear, with different groups of pathological states in each one.

### 724 Figure 2. Network modeling highlights physiological and pathological interactions.

725 Centrality measurements identify the role of each physiological variable or pathological state within  
726 the metabolic network. (A) Physiological network from 35 to 44 years old, and (B) pathological  
727 network from 55 to 64 years old, as examples of the different centrality contribution that each node  
728 has. Influence is measured by eigencentrality and is represented by node color, while betweenness is  
729 measured by flow and represented by node size. The values from these examples are emphasized  
730 inside gray rectangles. (C) Most influential nodes in the physiological variables network, Weight and  
731 waist, are indicated. (D) Most influential nodes as seen by eigencentrality in the pathological states  
732 network. Overweight, dyslipidemia and low eGFR are indicated. (E) Gatekeeping nodes, as seen by  
733 flow betweenness, that mediate the associations between those physiological variables that are not  
734 directly connected. (F) Gatekeeping nodes that are the route between unconnected pathological



735 states. The most meaningful nodes in this regard are hypertriglyceridemia, insulin resistance,  
 736 hyperglycemia and high HbA1c as age increases. □ indicates values unlikely to be found by chance  
 737 alone in CUG tests.

738  
 739 **Figure 3. Topological properties from physiological and pathological networks.**

740 Network structural changes as a function of age can be seen using several topological metrics. (A)  
 741 Physiological network of the third decade of life as a visual example of weighted transitivity in a  
 742 tightly intertwined network. (B) Pathological network of the fifth decade of life as an example of  
 743 weighted transitivity in a directed network. These two networks represent the greatest transitivity in  
 744 all age groups. (C) Weighted transitivity of each network as the mean  $\pm$  S.E.M. from all life decades,  
 745  $n=2572$ . The values that come from the physiological network nodes are highlighted in blue and for  
 746 the pathological states network in pink. (D) Weighted transitivity of each network as the mean  $\pm$   
 747 S.E.M. value of the 12 tested pathological states from all the age groups. Frequency distribution of  
 748 the weighted degree (strength) of the network in each life decade (E) for the physiological networks  
 749 and (F) for the pathological states networks. Age dissociates physiological variables, as seen by the  
 750 reduction of the weighted transitivity in the physiological network, but without a significant change  
 751 in the weighted degree, while pathological conditions become more associated with age, as seen in  
 752 the pathological network, reaching a peak at the fifth decade of life.

753  
 754 **Figure 4. Metabolic physiological network construction from matrices.**

755 (A) Correlation of 15 physiological variables and their corresponding 12 pathological states  
 756 associations were modelled using Spearman correlation and  $\epsilon$  value, respectively. (B) Adjacency  
 757 matrix as a heatmap where the darker the red indicates a greater monotonic relationship between two  
 758 physiological variables, as calculated by the Spearman rank correlation rho. (C)  $\epsilon$  value between each  
 759 pair of pathological states, a darker red indicating a greater probability of coexistence. In both  
 760 heatmaps, rows and columns are ordered by weighted degree, and on the left side of the heat maps  
 761 the resulting hierarchical dendrogram is shown. For directed networks some nodes lacked outgoing  
 762 links, this is presented as blank rows. (D) Undirected network of physiological variables for the  
 763 whole sample. The edges are weighted by the rho value in the Spearman correlation. The size of the  
 764 node shows the flow betweenness of a node, the eigencentality is shown by its colour and the colour  
 765 shadowed areas indicate the Louvain clusters. (E) Directed network of pathological states. The edges  
 766 are weighted by the  $\epsilon$  value, the size of the node shows the flow betweenness of each node, the  
 767 eigencentality is shown by its colour and the colour shadowed areas indicate spinglass clusters. In  
 768 both networks, the red subgraph shows the components of MetS, while the blue subgraph highlights  
 769 the largest clique and the diameter of the network is in purple. For Spearman correlation, values with  
 770  $p>0.001$  were discarded, whereas for  $\epsilon$ , values below 1.96 were discarded.

771  
 772 **Table 1. Demographic description of the population.** General description of the total sample and  
 773 the age groups is provided with sex (female percentage), mean age  $\pm$  SD and total number of  
 774 participants in each group. The presence of a trend with age by chi-squared tests for trends is  
 775 indicated by \*\*\* for  $p<0.001$ .

|                           | Total       |            | Age groups |            |            |            |            |
|---------------------------|-------------|------------|------------|------------|------------|------------|------------|
|                           | 18-81       | <25        | 25-34      | 35-44      | 45-54      | 55-64      | >65        |
| Age range (min-max years) |             |            |            |            |            |            |            |
| Age (years $\pm$ SD)      | 38 $\pm$ 15 | 20 $\pm$ 2 | 30 $\pm$ 3 | 40 $\pm$ 3 | 50 $\pm$ 3 | 59 $\pm$ 3 | 70 $\pm$ 4 |
| Sex (female%)             | 65%         | 68%        | 57%        | 66%        | 72%        | 60%        | 64%        |
| n                         | 2572        | 680        | 528        | 445        | 468        | 352        | 99         |
| Basic education***        | 16%         | 2%         | 6%         | 13%        | 20%        | 21%        | 22%        |

|                    |     |     |     |     |     |     |     |
|--------------------|-----|-----|-----|-----|-----|-----|-----|
| Undergraduate***   | 50% | 97% | 64% | 51% | 55% | 45% | 29% |
| Postgraduate***    | 34% | 0%  | 31% | 35% | 25% | 35% | 48% |
| MetS prevalence*** | 25% | 4%  | 19% | 35% | 42% | 47% | 43% |

776  
777  
778

**Table 2. Pathological states criteria.** Threshold values employed for the classification of pathological states. Current criteria that are tailored for age and sex are indicated in the columns.

|    | Physiological variables  |    | Pathological states   | Cut-off value                   | Sex | Age | Organization | Reference                           |
|----|--------------------------|----|-----------------------|---------------------------------|-----|-----|--------------|-------------------------------------|
| 1  | Fasting glucose (mmol/L) | 1  | Hyper-glycemia        | >5.55 mmol/L                    |     |     | IDF          | Alberti et al., 2009                |
| 2  | HbA1c (%)                | 2  | High HbA1c            | >6.5 %                          |     |     | ADA          | American Diabetes Association, 2020 |
| 3  | Basal insulin (pmol/L)   | 3  | Insulin resistance    | M >1.7<br>F >1.8                | X   |     | —            | Esteghamati et al., 2009            |
| 4  | HDL (mmol/L)             | 4  | Low HDL               | M <1.03 mmol/L<br>F <1.3 mmol/L | X   |     | IDF          | Alberti et al., 2009                |
| 5  | LDL (mmol/L)             | 5  | High LDL              | >3 mmol/L                       |     |     | ESC/EAS      | Mach et al., 2019                   |
| 6  | Triglycerides (mmol/L)   | 6  | Hyper-triglyceridemia | >1.7 mmol/L                     |     |     | IDF          | Alberti et al., 2009                |
| 7  | Uric Acid (umol/L)       | 7  | Hyper-uricemia        | >405 umol/L                     |     |     | ACR          | Khana et al., 2012                  |
| 8  | Urea (mmol/L)            | 8  | Azotemia              | >7.5 mmol/L                     |     |     | —            | Tyagi and Aeddula, 2019             |
| 9  | Creatinine (umol/L)      | 9  | Low eGFR              | <90 ml/min                      | X   | X   | KDIGO        | Levin et al., 2013                  |
| 10 | Waist (cm)               |    |                       |                                 |     |     |              |                                     |
| 11 | Weight (Kg)              | 10 | Overweight            | M >90 cm<br>F >80 cm            | X   |     | IDF          | Alberti et al., 2009                |
| 12 | Height (cm)              |    |                       |                                 |     |     |              |                                     |
| 13 | Axilar temperature (°C)  | 11 | High Temperature      | >37°C                           |     |     | —            | Sund-Levander et al., 2002          |
| 14 | Systolic (mmHg)          | 12 | High Blood Pressure   | > 120/80 mmHg                   |     |     | ACC/AHA      | Whelton et al., 2017                |

15 Diastolic (mmHg)

779

780

781

782

783

784

**Table 3. Physiological variables means and pathological states prevalence.** Mean  $\pm$  SD of each of the 15 physiological variables and prevalence of each of the 12 pathological states are displayed for each group. Linear regressions for the physiological variables, and chi-squared tests for trends of the pathological states prevalence are given. Significance of the trend with age is indicated by \*for  $p < 0.05$ , \*\* for  $p < 0.01$ , and \*\*\* for  $p < 0.001$ .

| Physiological variable          | Slope             | Age groups                      |                |                |                |                |                |                |
|---------------------------------|-------------------|---------------------------------|----------------|----------------|----------------|----------------|----------------|----------------|
|                                 |                   | Total                           | <25            | 25-34          | 35-44          | 45-54          | 55-64          | >65            |
|                                 |                   | <b>Mean <math>\pm</math> SD</b> |                |                |                |                |                |                |
| Waist (cm)                      | 0.3<br>***        | 88 $\pm$ 12                     | 82 $\pm$ 11    | 87 $\pm$ 12    | 91 $\pm$ 12    | 93 $\pm$ 12    | 93 $\pm$ 11    | 94 $\pm$ 12    |
| Systolic blood pressure (mmHg)  | 0.3<br>***        | 113 $\pm$ 14                    | 109 $\pm$ 11   | 109 $\pm$ 12   | 113 $\pm$ 14   | 115 $\pm$ 14   | 121 $\pm$ 16   | 124 $\pm$ 19   |
| Diastolic blood pressure (mmHg) | 0.2<br>***        | 74 $\pm$ 10                     | 71 $\pm$ 9     | 73 $\pm$ 9     | 76 $\pm$ 11    | 77 $\pm$ 10    | 79 $\pm$ 11    | 78 $\pm$ 11    |
| Weight (Kg)                     | 0.17<br>***       | 68 $\pm$ 15                     | 63 $\pm$ 13    | 68 $\pm$ 15    | 72 $\pm$ 15    | 71 $\pm$ 14    | 70 $\pm$ 14    | 68 $\pm$ 13    |
| Basal insulin (pmol/L)          | 0.12<br>ns        | 58 $\pm$ 48                     | 55 $\pm$ 36    | 54 $\pm$ 52    | 57 $\pm$ 42    | 60 $\pm$ 62    | 59 $\pm$ 40    | 59 $\pm$ 44    |
| Creatinine (umol/L)             | 0.12<br>**        | 72 $\pm$ 29                     | 70 $\pm$ 14    | 74 $\pm$ 45    | 70 $\pm$ 16    | 70 $\pm$ 17    | 74 $\pm$ 18    | 88 $\pm$ 78    |
| Uric Acid (umol/L)              | 0.09<br>ns        | 322 $\pm$ 87                    | 323 $\pm$ 92   | 326 $\pm$ 90   | 319 $\pm$ 87   | 315 $\pm$ 82   | 331 $\pm$ 88   | 335 $\pm$ 85   |
| Fasting glucose (mmol/L)        | 0.028<br>***      | 5 $\pm$ 1.5                     | 4.6 $\pm$ 0.5  | 4.7 $\pm$ 0.7  | 5 $\pm$ 1      | 5 $\pm$ 2      | 5 $\pm$ 2      | 6 $\pm$ 2      |
| Urea (mmol/L)                   | 0.026<br>***      | 5 $\pm$ 1                       | 4 $\pm$ 1      | 5 $\pm$ 2      | 4 $\pm$ 1      | 5 $\pm$ 1      | 5 $\pm$ 1      | 6 $\pm$ 2      |
| HbA1c (%)                       | 0.022<br>***      | 5.5 $\pm$ 1                     | 5.1 $\pm$ 0.5  | 5.1 $\pm$ 0.6  | 5 $\pm$ 2      | 6 $\pm$ 2      | 6 $\pm$ 2      | 6 $\pm$ 2      |
| Triglycerides (mmol/L)          | 0.019<br>***      | 1.6 $\pm$ 1                     | 1.1 $\pm$ 0.6  | 1 $\pm$ 1      | 2 $\pm$ 2      | 2 $\pm$ 1      | 2 $\pm$ 1      | 2 $\pm$ 1      |
| LDL (mmol/L)                    | 0.016<br>***      | 3 $\pm$ 1                       | 2.5 $\pm$ 0.6  | 3 $\pm$ 1      | 3 $\pm$ 2      | 3.2 $\pm$ 0.8  | 3.3 $\pm$ 0.9  | 3.2 $\pm$ 0.8  |
| HDL (mmol/L)                    | 0.0004<br>ns      | 1.2 $\pm$ 0.3                   | 1.3 $\pm$ 0.3  | 1.2 $\pm$ 0.3  | 1.2 $\pm$ 0.3  | 1.2 $\pm$ 0.3  | 1.2 $\pm$ 0.3  | 1.3 $\pm$ 0.3  |
| Height (cm)                     | -0.098<br>***     | 162 $\pm$ 9                     | 162 $\pm$ 9    | 164 $\pm$ 9    | 162 $\pm$ 9    | 159 $\pm$ 9    | 160 $\pm$ 10   | 159 $\pm$ 10   |
| Axilar temperature (°C)         | -0.0053<br>***    | 37 $\pm$ 0.5                    | 37.2 $\pm$ 0.5 | 37.0 $\pm$ 0.5 | 37.0 $\pm$ 0.5 | 37.0 $\pm$ 0.5 | 36.8 $\pm$ 0.5 | 36.7 $\pm$ 0.6 |
|                                 |                   | <b>Prevalence (%)</b>           |                |                |                |                |                |                |
| <b>Pathological states</b>      | <b>Chi-square</b> |                                 |                |                |                |                |                |                |
| Overweight                      | 506<br>***        | 60                              | 38             | 52             | 73             | 80             | 82             | 80             |
| Low eGFR                        | 463<br>***        | 22                              | 4.6            | 11             | 18             | 34             | 51             | 75             |
| Hyperglycemia                   | 228<br>***        | 13                              | 1.5            | 4.4            | 12             | 23             | 28             | 31             |
| High Blood                      | 202               | 21                              | 11             | 11             | 22             | 28             | 42             | 41             |

|                      |            |     |     |     |     |     |     |    |
|----------------------|------------|-----|-----|-----|-----|-----|-----|----|
| Pressure             | ***        |     |     |     |     |     |     |    |
| High LDL             | 189<br>*** | 49  | 24  | 42  | 51  | 62  | 65  | 62 |
| Hypertriglyceridemia | 159<br>*** | 33  | 14  | 32  | 41  | 44  | 48  | 43 |
| High HbA1c           | 116<br>*** | 5.6 | 0.7 | 0.6 | 5.2 | 8.8 | 12  | 18 |
| Azotemia             | 41<br>***  | 3.2 | 0.4 | 2.4 | 3.8 | 6.1 | 7.5 | 15 |
| Insulin resistance   | 10.3<br>** | 14  | 9.2 | 12  | 13  | 14  | 16  | 12 |
| Low HDL              | 8.8<br>**  | 47  | 43  | 46  | 53  | 50  | 42  | 39 |
| Hyperuricemia        | 4.5<br>*   | 15  | 13  | 19  | 14  | 14  | 18  | 21 |
| High Temperature     | 0.05<br>ns | 1.1 | 0.9 | 0.4 | 0.9 | 1.7 | 0.6 | 0  |

785

786

787

788

**Table 4. Topological properties of the physiological variables and pathological states networks.**

Global measurements for topological properties are shown for each network. In the case of the pathological states network, since it is directed, reciprocity of the network is also shown.

|                                         | Total | Age groups |       |       |       |       |      |
|-----------------------------------------|-------|------------|-------|-------|-------|-------|------|
|                                         |       | <25        | 25-34 | 35-44 | 45-54 | 55-64 | >65  |
| <b>Physiological variables networks</b> |       |            |       |       |       |       |      |
| Density                                 | 0.73  | 0.47       | 0.63  | 0.53  | 0.49  | 0.39  | 0.26 |
| Global transitivity                     | 0.79  | 0.71       | 0.74  | 0.70  | 0.70  | 0.67  | 0.47 |
| Characteristic path length $L$          | 1.27  | 1.38       | 1.40  | 1.57  | 1.67  | 1.54  | 1.85 |
| Clustering coefficient $C$              | 0.84  | 0.67       | 0.78  | 0.69  | 0.63  | 0.58  | 0.51 |
| Smallworld Index                        | 1.3   | 1.9        | 1.3   | 1.4   | 1.5   | 2.1   | 2.3  |
| <b>Pathological states networks</b>     |       |            |       |       |       |       |      |
| Density                                 | 0.48  | 0.33       | 0.40  | 0.40  | 0.42  | 0.39  | 0.30 |
| Reciprocity                             | 0.07  | 0.10       | 0.04  | 0.06  | 0.04  | 0.06  | 0.03 |
| Global transitivity                     | 0.91  | 0.69       | 0.79  | 0.79  | 0.83  | 0.78  | 0.67 |
| Characteristic path length $L$          | 1.19  | 1.27       | 1.15  | 1.23  | 1.20  | 1.25  | 1.09 |
| Clustering coefficient $C$              | 0.50  | 0.41       | 0.41  | 0.43  | 0.43  | 0.42  | 0.32 |
| Smallworld Index                        | 2.8   | 3.5        | 3.3   | 3.1   | 3.1   | 3.1   | 4.6  |

789

**A**

>65 years old  
Network

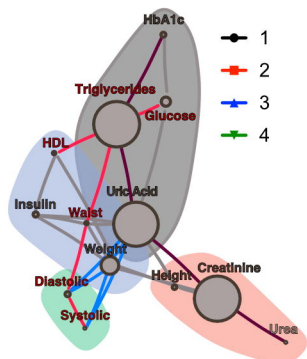**B**

<25 years old  
Network

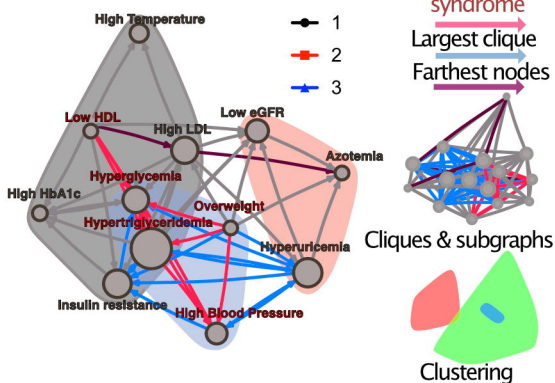**C**

Physiological network

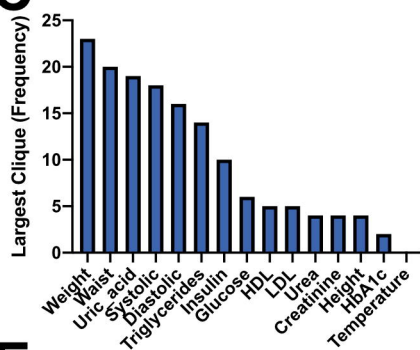**D**

Pathological network

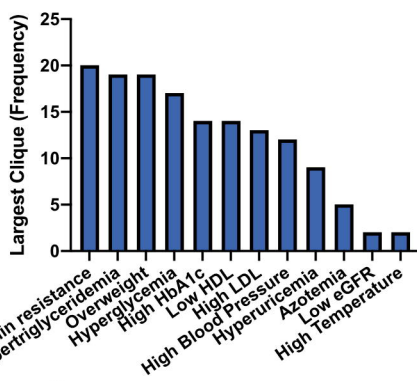**E**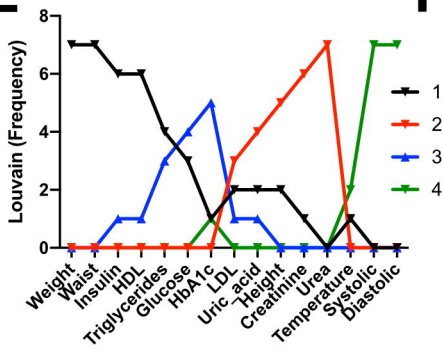**F**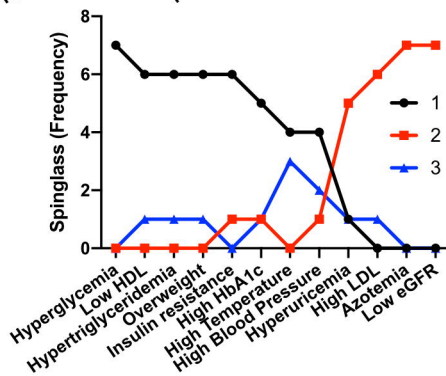

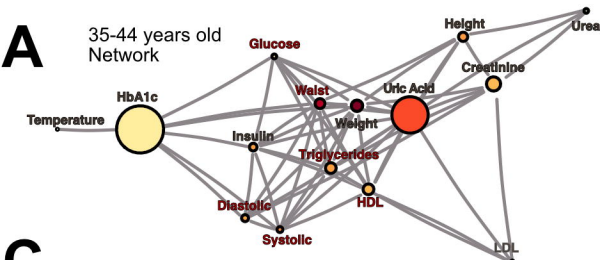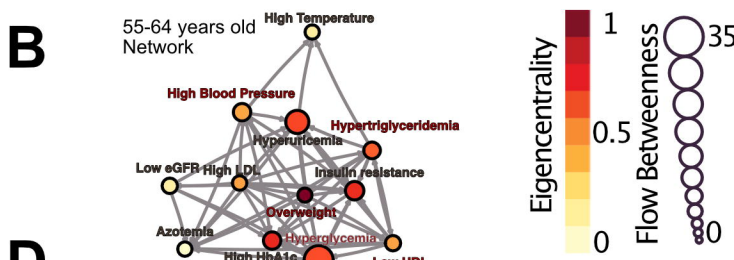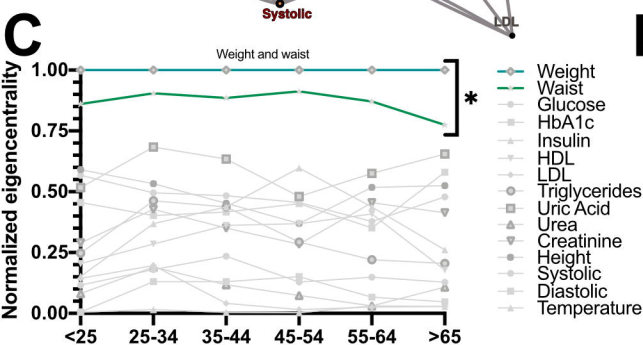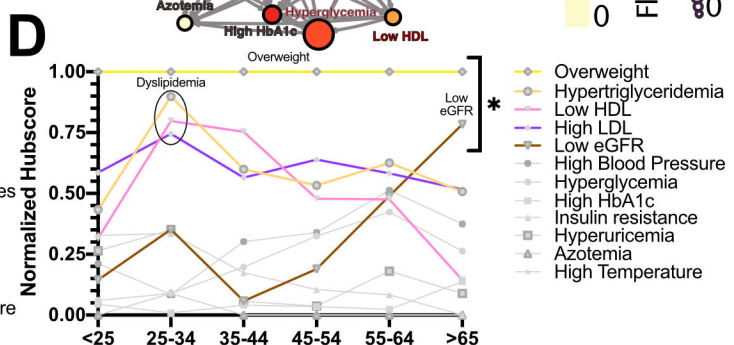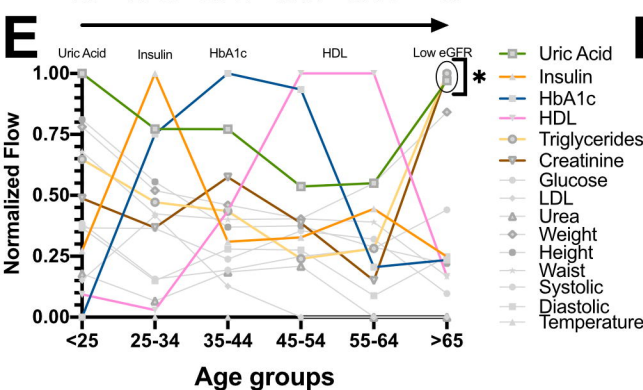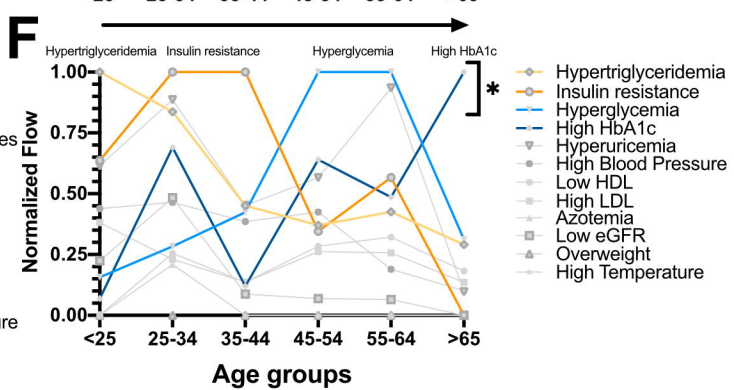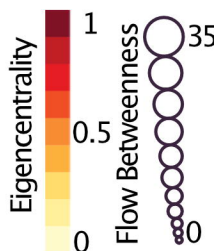

**A**25-34 years  
old Network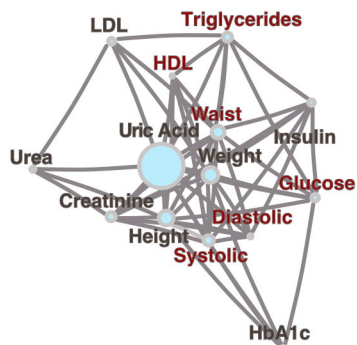**B**45-54 years  
old Network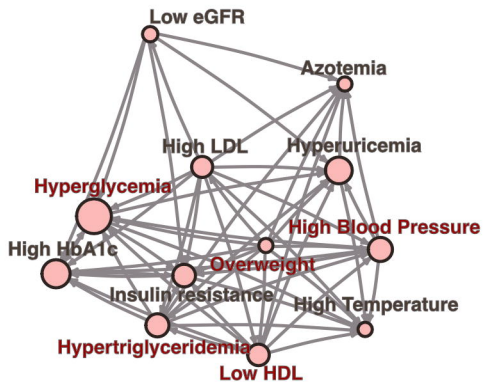**C****Health States**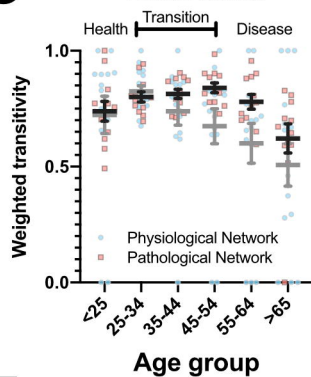**D****Community structure**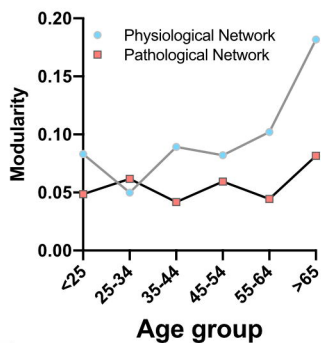**E**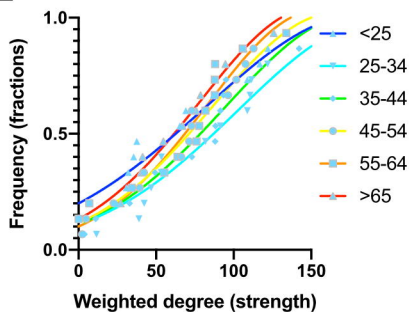**F**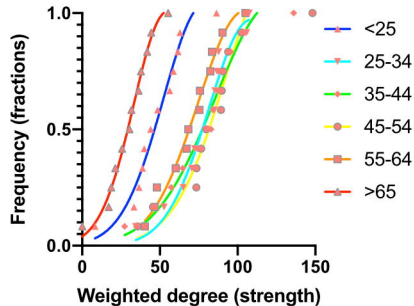

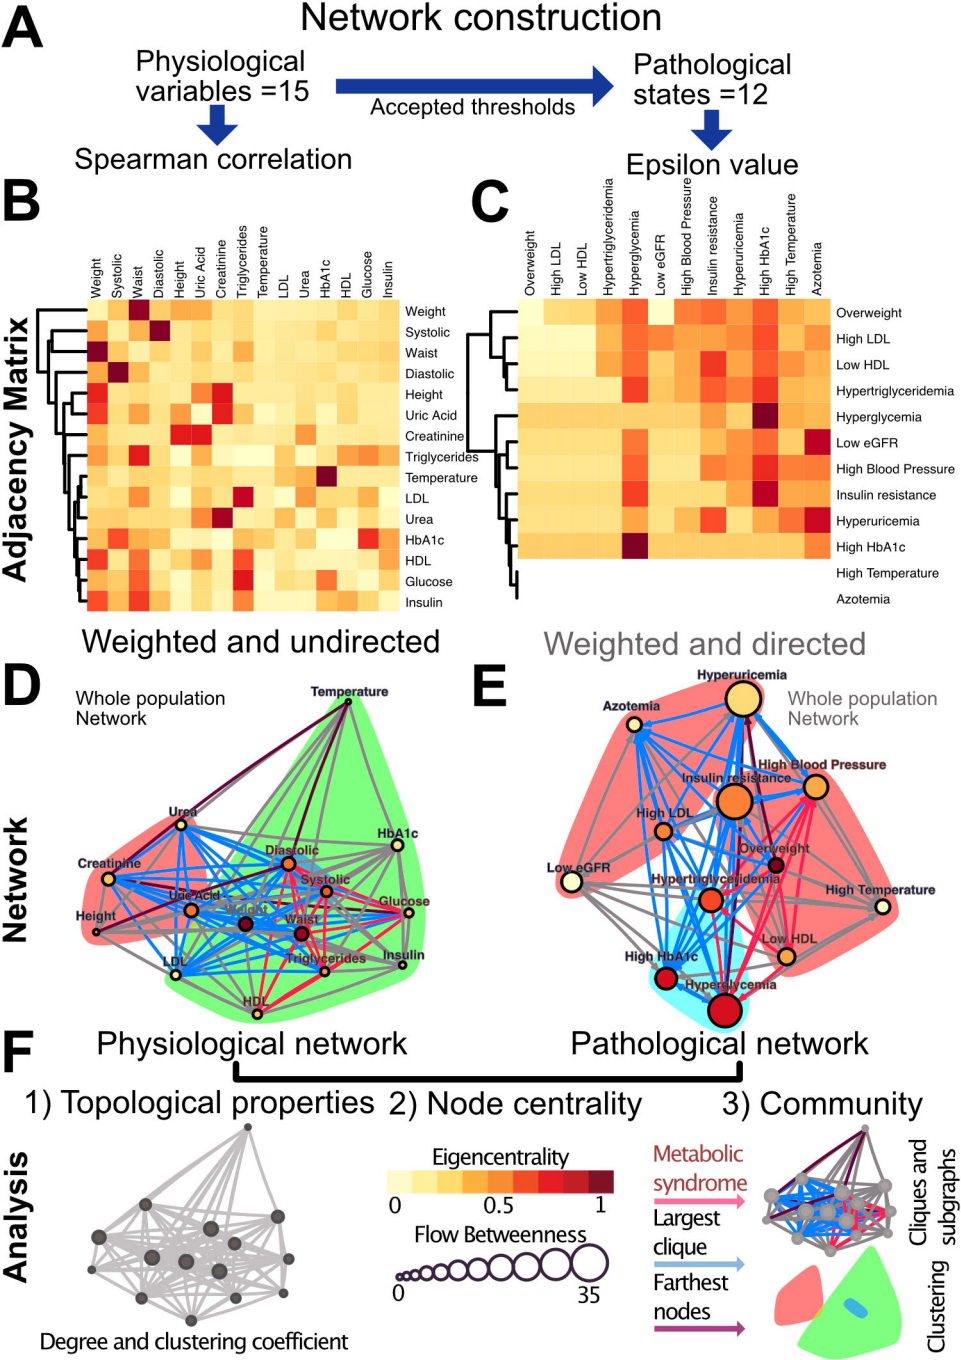

Source: https://medrxiv.org/content/10.1101/2020.08.05.20168997v1.full.pdf
